# Supplementary material
Source: PubMed Central journal article supplement (PMC9633455)
Supplement: NIHMS1834828-supplement-2.pdf [file NIHMS1834828-supplement-2.pdf]

# Supplemental Figure 1

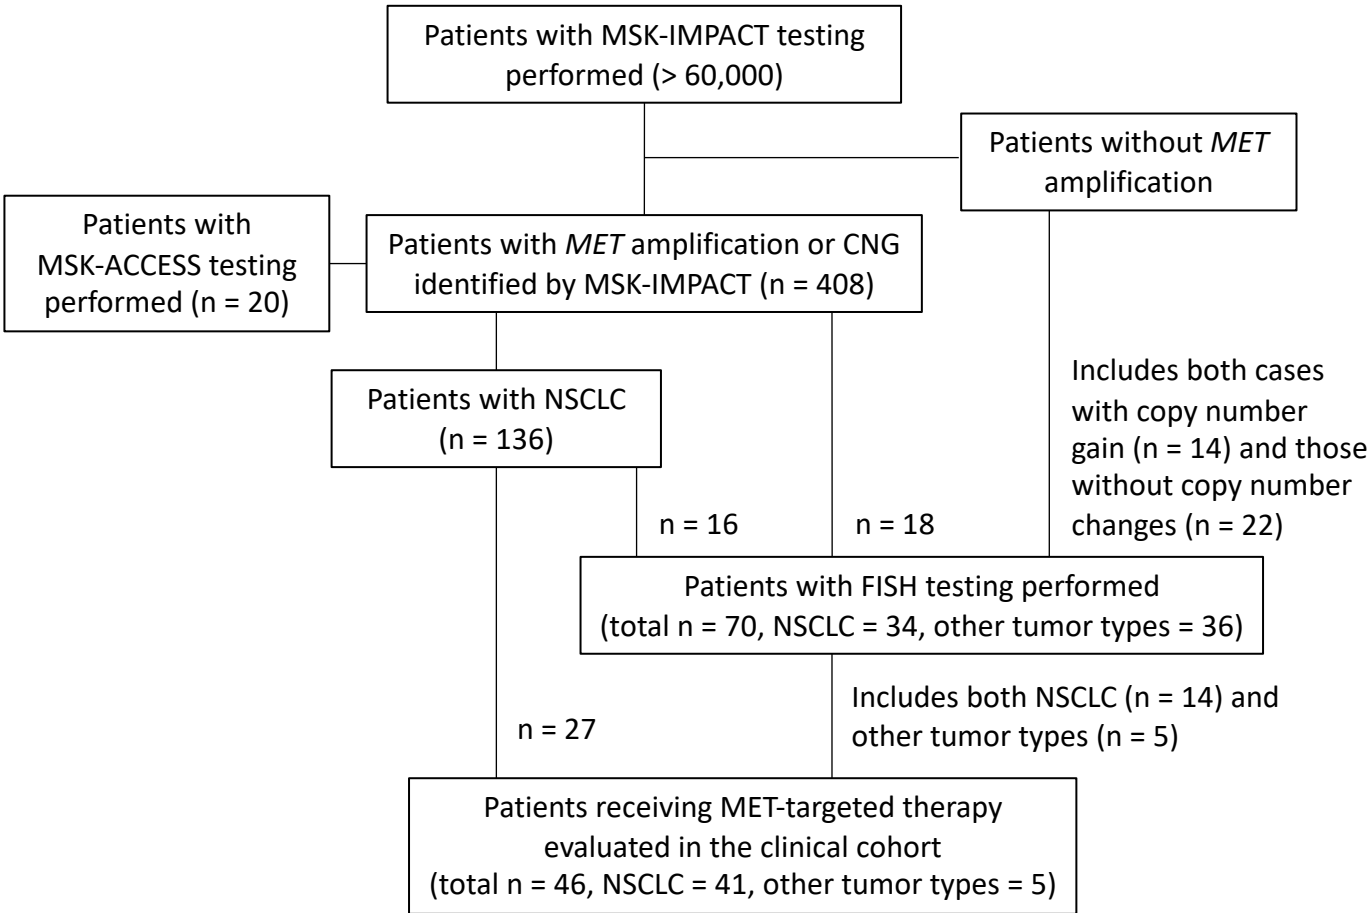

**Supplementary Figure 1.** Consort Diagram delineating the various patient cohorts in this study.
