# Supplementary material
Source: PubMed Central journal article supplement (PMC9633455)
Supplement: NIHMS1834828-supplement-4.pdf [file NIHMS1834828-supplement-4.pdf]

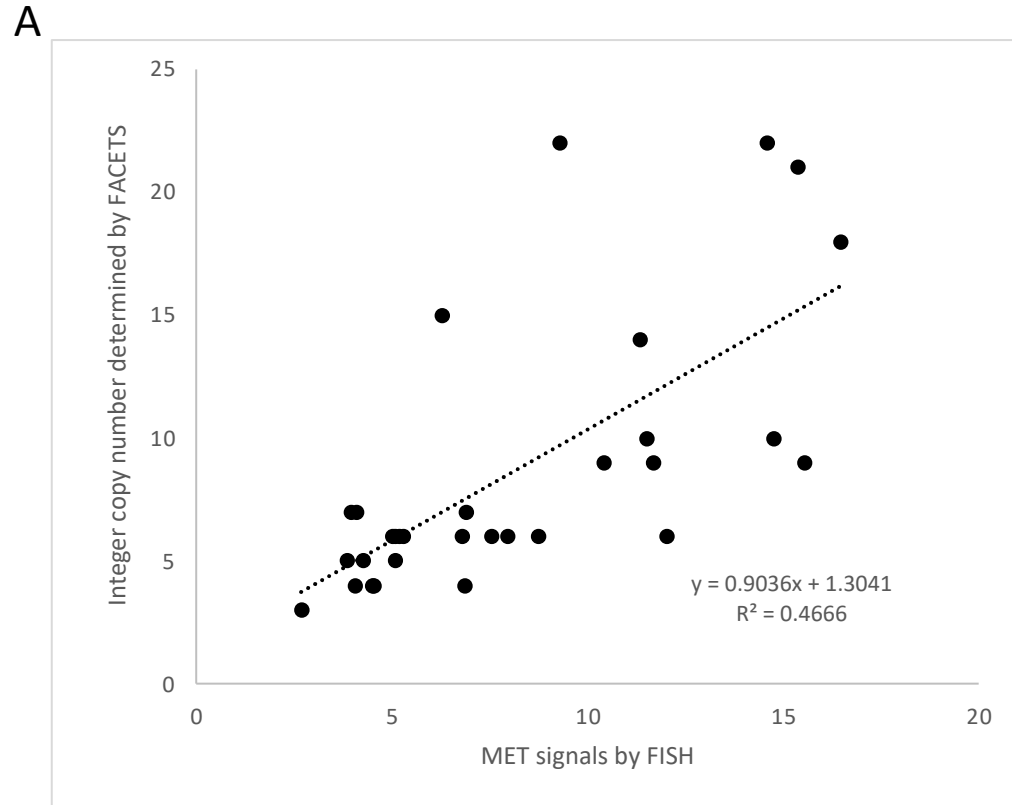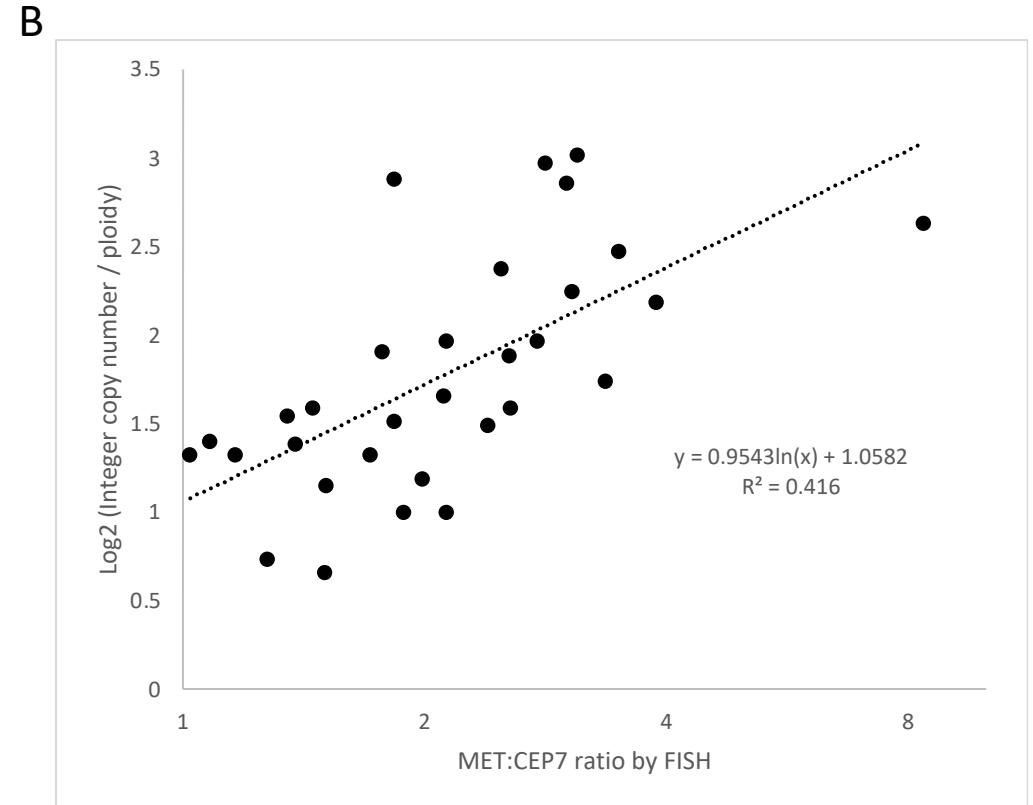

**Supplementary Figure 3.** Comparison of quantitative FACETS assessment with FISH. **A.** Comparison of the FACETS integer copy number values with the number of *MET* signals as determined by FISH, plotted on a linear scale. **B.** Comparison of the FACETS log<sub>2</sub> ratio of integer copy number divided by ploidy with *MET:CEP7* ratio by FISH.
