# Supplementary material
Source: PubMed Central journal article supplement (PMC9633455)
Supplement: NIHMS1834828-supplement-5.pdf [file NIHMS1834828-supplement-5.pdf]

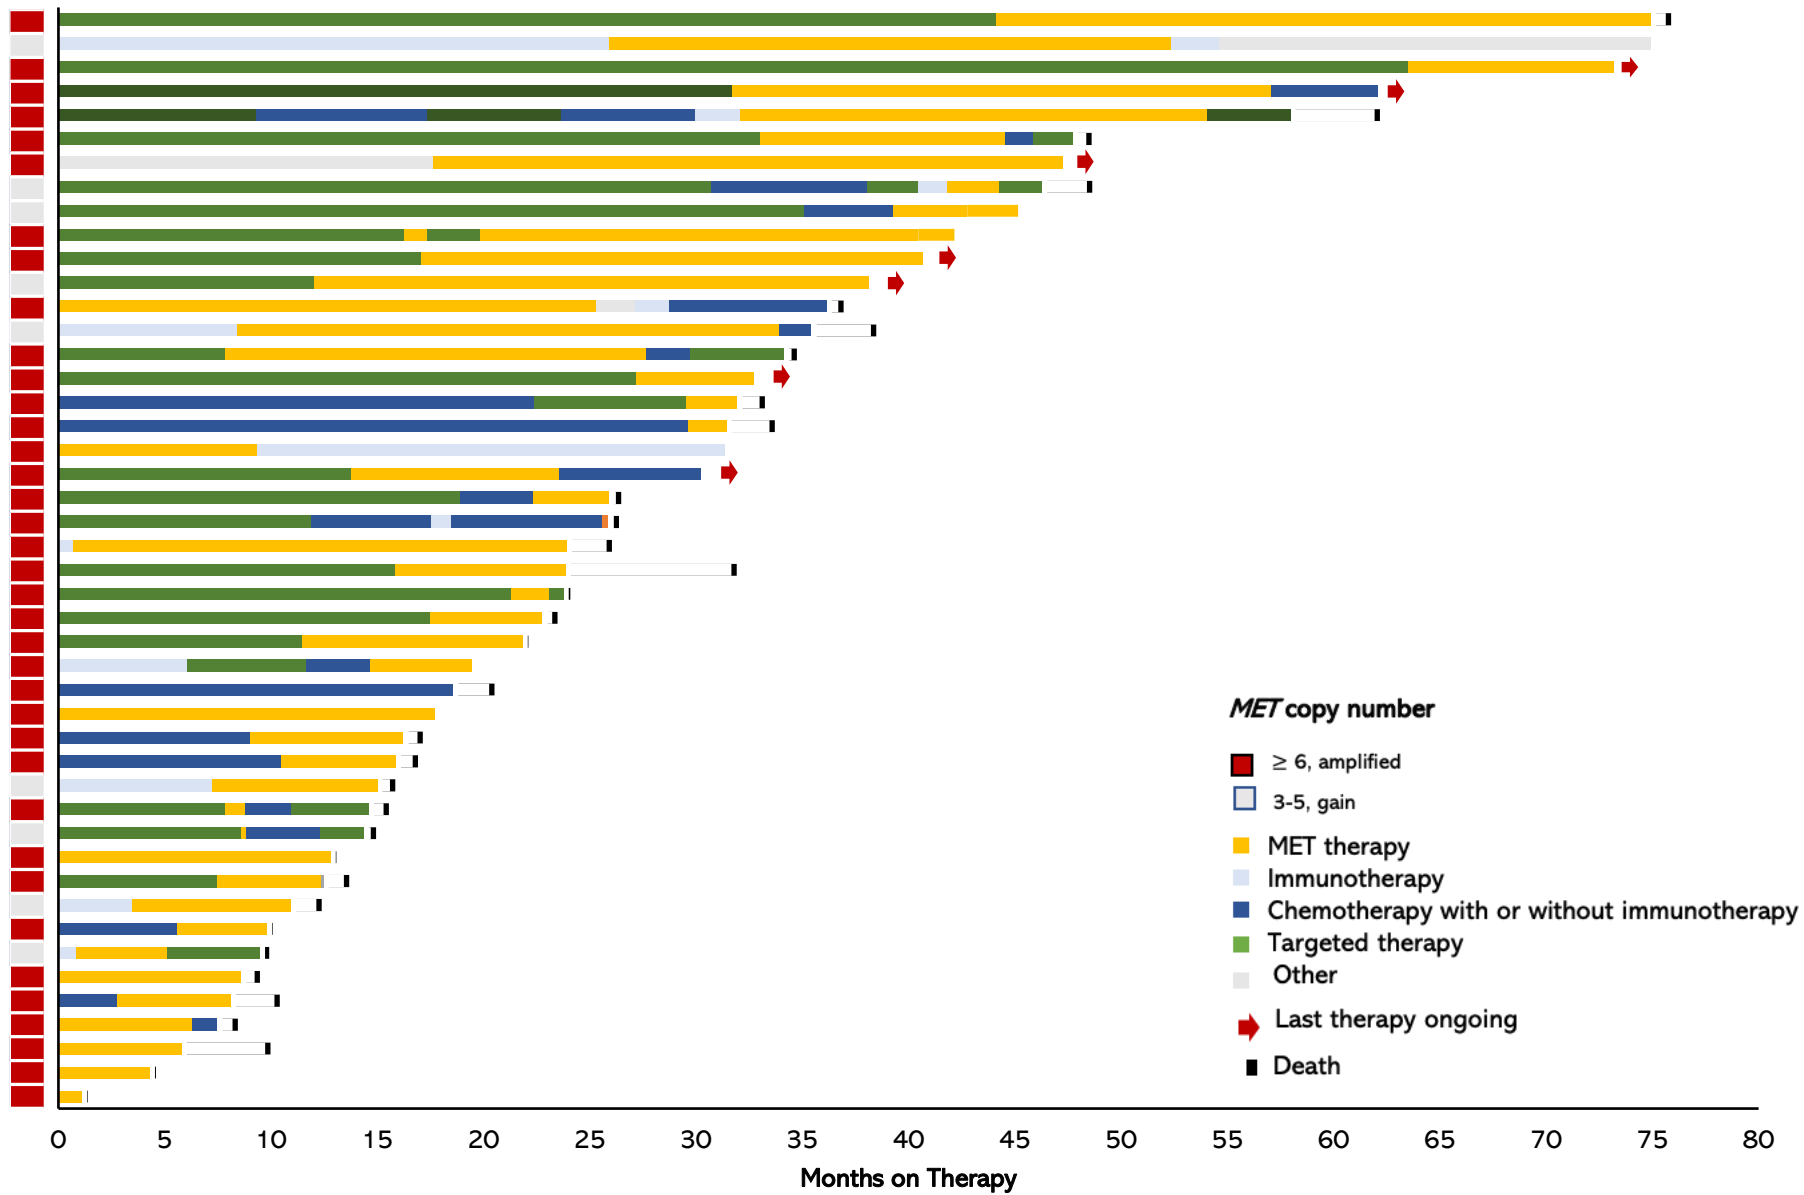

**Supplementary Figure 4.** Treatment outcomes for all lines of MET therapy. Swimmers plot demonstrating all lines of therapy patients received throughout treatment. At the time of the data lock, four patients continued treatment; 45 treatments were discontinued for progressive disease, six for toxicity, and two electively to pursue other treatments before disease progression.
